# Supplementary material
Source: PubMed Central journal article supplement (PMC4357960)
Supplement: AEM.04016-14_zam999116156so1.pdf [file AEM.04016-14_zam999116156so1.pdf]

1 **Supporting Information**

2 **Evolutionary expansion of the amidohydrolase superfamily in bacteria in response to**  
3 **synthetic compounds: the molinate and diuron hydrolases.**

4 *Elena Sugrue<sup>†</sup>, Nicholas J Fraser<sup>†</sup>, Davis H Hopkins<sup>†</sup>, Paul D Carr<sup>†</sup>, Jeevan L Khurana<sup>‡</sup>, John*  
5 *G Oakeshott<sup>‡</sup>, Colin Scott<sup>‡</sup>, Colin J Jackson<sup>#, †, ‡</sup>*

6 <sup>†</sup>Research School of Chemistry, Australian National University, Canberra, ACT, Australia;

7 <sup>‡</sup>CSIRO Entomology, Canberra, ACT, Australia

8 #Corresponding author. Email: colin.jackson@anu.edu.au

9

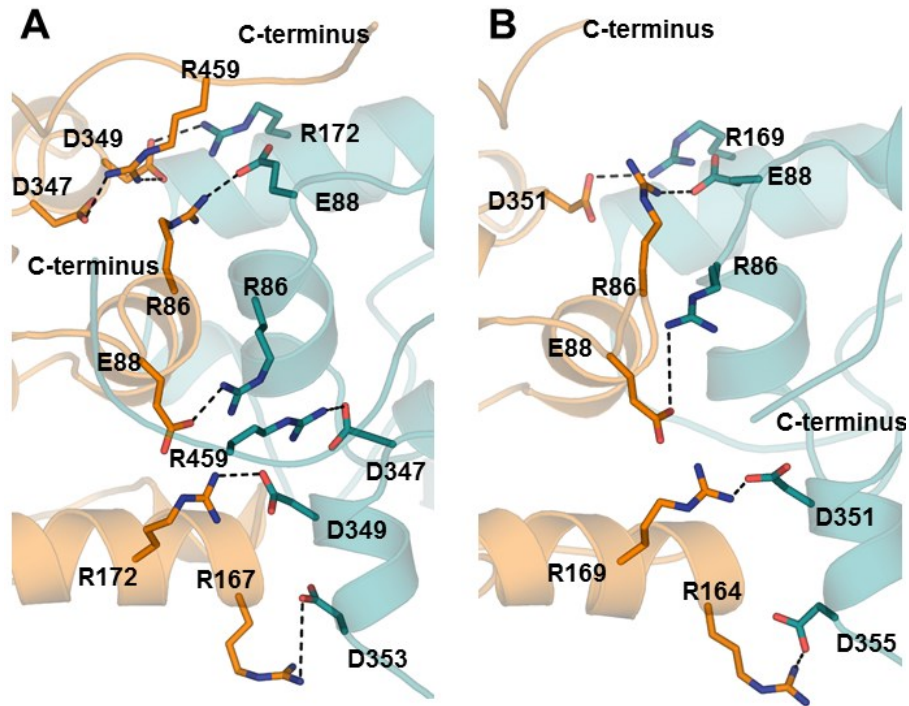

10

11 **FIG. S1** Both MolA (**A**) and PuhB (**B**) have extensive salt bridge formation across the dimer-  
 12 dimer interface (orange, blue). The extended length of the MolA C-terminus allows for  
 13 additional salt-bridge formation *via* R459 (**A**).

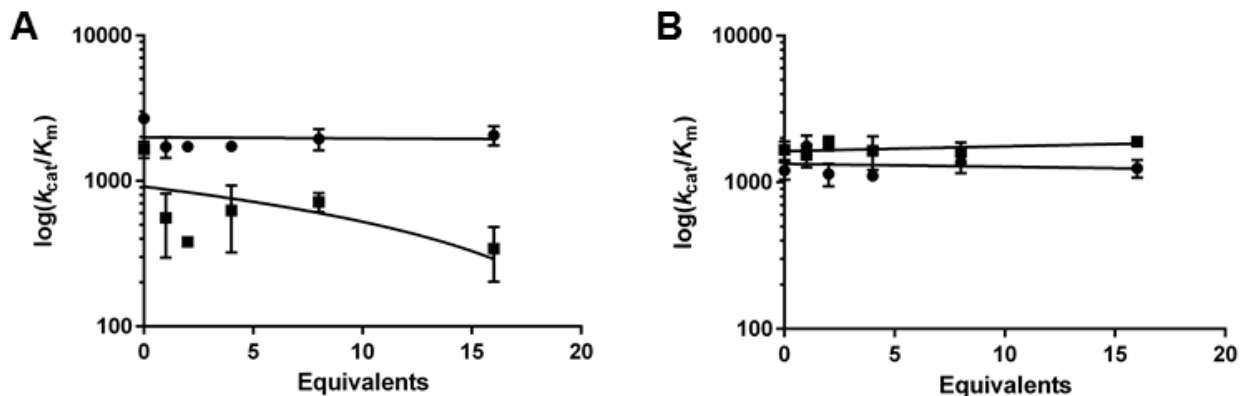

14

15 **FIG. S2 (A)** An exogenous supply of cobalt (●) and zinc (■) does not increase the activity of  
 16 MolA. **(B)** Exogenous bicarbonate addition has no effect on Co-MolA (●) or Zn-MolA (■), in  
 17 the presence of two equivalents of the respective metals. Error bars represent the standard  
 18 deviation of two independent replicates. Equivalents refer to the relative concentration of  
 19 exogenous metal or bicarbonate to protein concentration.

20 **TABLE S1** Effect of the metal cation on molinate hydrolase (MolA) thermostability

| Enzyme    | Melting point (°C) <sup>21</sup> |
|-----------|----------------------------------|
| Zinc-MolA | 46.0 ± 0.34 <sup>22</sup>        |
| Apo-MolA  | 50.8 ± 0.31 <sup>23</sup>        |

24

25 **FIGURE S3 (A)** Substrates from which kinetic parameters could be calculated with molinate  
 26 hydrolase. **(B)** Substrates with which there was detectable hydrolysis. **(C)** Substrates with which  
 27 there was no detectable hydrolysis.

|                                                                                                                                   |                                                                                                |                                                                                                                         |
|-----------------------------------------------------------------------------------------------------------------------------------|------------------------------------------------------------------------------------------------|-------------------------------------------------------------------------------------------------------------------------|
| <b>A</b><br>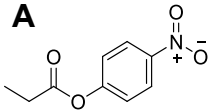<br><i>p</i> -nitrophenyl propionate | <br>Molinate  | <br>Paraoxon ethyl                   |
| <br><i>p</i> -nitrophenyl butyrate               | <br>Ethiolate | <br>L-alanine <i>p</i> -nitroanilide |

28

|                                                                                                                        |                                                                                                                        |                                                                                                                           |
|------------------------------------------------------------------------------------------------------------------------|------------------------------------------------------------------------------------------------------------------------|---------------------------------------------------------------------------------------------------------------------------|
| <b>B</b><br>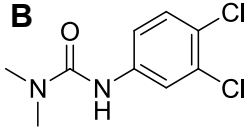<br>Diuron              | <br>EPTC                            | <br><i>o</i> -nitrophenyl acetate    |
| <br><i>p</i> -nitrophenyl hexanoate | <br>Parathion methyl                | <br>L-leucine <i>p</i> -nitroanilide |
| <br>Parathion ethyl                 | <br><i>p</i> -nitrophenyl octanoate | <br>L-lysine <i>p</i> -nitroanilide  |

29

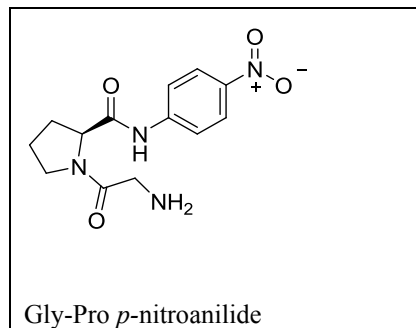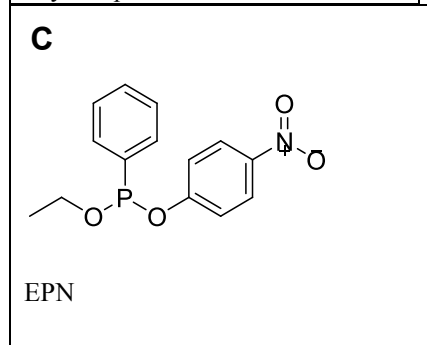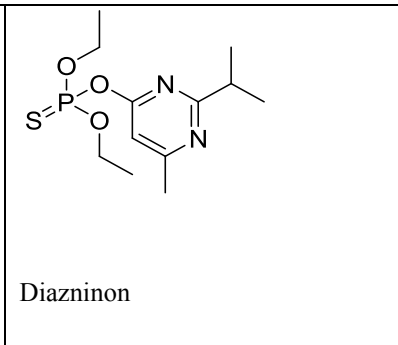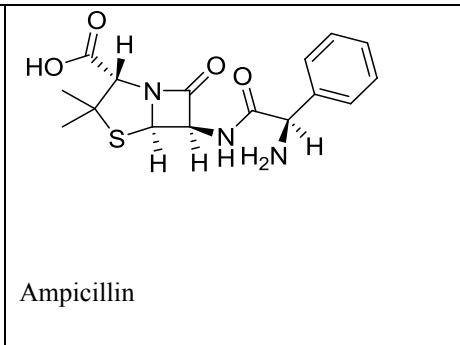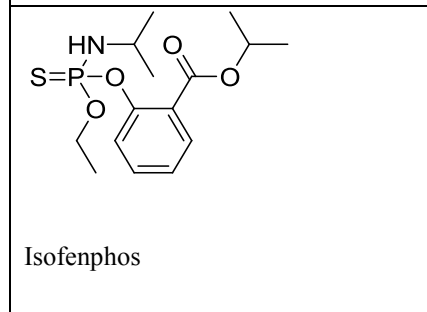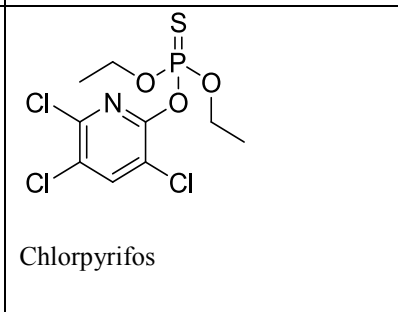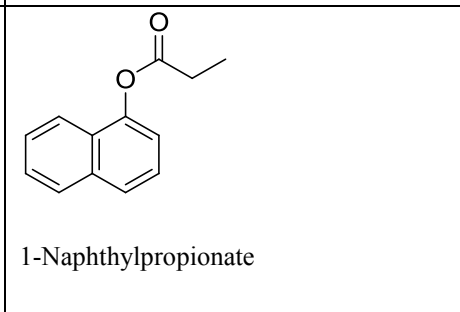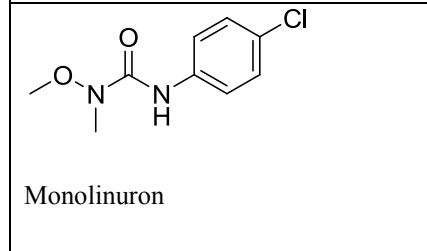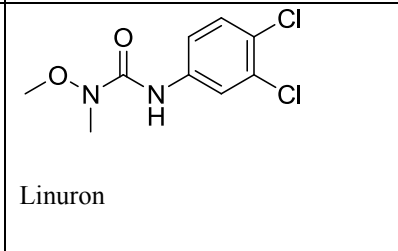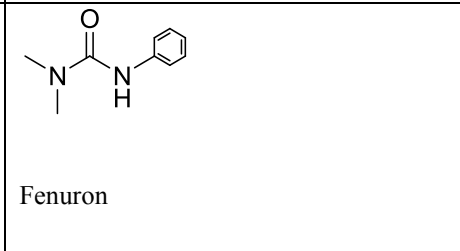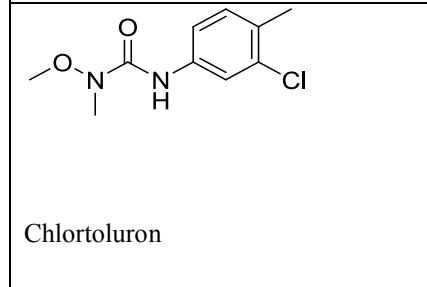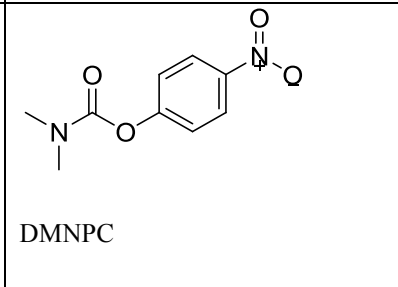

31 **TABLE S2** The kinetic parameters for wild-type MolA and variants with molinate, ethiolate,  
 32 paraoxon ethyl, *p*-nitrophenyl butyrate, L-alanine *p*-nitroanilide and diuron. The  $k_{\text{cat}}/K_m$  of diuron  
 33 was estimated using a single fixed substrate concentration well below the  $K_m$ . Values shown are  
 34 the mean and 95% confidence interval of the calculated kinetics.

| Substrate                                                                                        | Variant   | $K_m$ ( $\mu\text{M}$ ) | $k_{\text{cat}}$ ( $\text{s}^{-1}$ )         | $k_{\text{cat}}/K_m$ ( $\text{M}^{-1}\text{s}^{-1}$ ) |
|--------------------------------------------------------------------------------------------------|-----------|-------------------------|----------------------------------------------|-------------------------------------------------------|
| Molinate<br>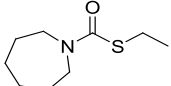    | Wild-type | 6.88±1.85               | 8.24x10 <sup>-3</sup> ±6.54x10 <sup>-4</sup> | 120 x10 <sup>1</sup>                                  |
|                                                                                                  | D327E     | 27.09±1.27              | 1.22x10 <sup>-2</sup> ±4.62x10 <sup>-4</sup> | 450                                                   |
|                                                                                                  | S319G     | 14.79±4.67              | 5.57x10 <sup>-2</sup> ±3.21x10 <sup>-3</sup> | 376 x 10 <sup>1</sup>                                 |
|                                                                                                  | N69H      | 0                       | 0                                            | 0                                                     |
|                                                                                                  | H215N     | 0                       | 0                                            | 0                                                     |
|                                                                                                  | F318V     | 161.27±15.4             | 3.29x10 <sup>-3</sup> ±1.75x10 <sup>-5</sup> | 20.4                                                  |
|                                                                                                  | I73M      | 17.12±4.54              | 1.17x10 <sup>-2</sup> ±8.42x10 <sup>-4</sup> | 153 x10 <sup>1</sup>                                  |
|                                                                                                  | V217C     | 59.42±15.56             | 1.17x10 <sup>-2</sup> ±2.54x10 <sup>-4</sup> | 197                                                   |
|                                                                                                  | F318M     | 62.17±5.40              | 1.16x10 <sup>-2</sup> ±3.16x10 <sup>-4</sup> | 189                                                   |
| Ethiolate<br> | Wild-type | 1976.37±322.46          | 6.66x10 <sup>-2</sup> ±1.79x10 <sup>-3</sup> | 33.7                                                  |
|                                                                                                  | D327E     | 1965.10±722.71          | 2.91x10 <sup>-2</sup> ±3.31x10 <sup>-3</sup> | 14.8                                                  |
|                                                                                                  | S319G     | 6266.73±1079.17         | 6.06x10 <sup>-2</sup> ±6.20x10 <sup>-3</sup> | 9.67                                                  |
|                                                                                                  | F318V     | 2914.30±2205.85         | 1.03x10 <sup>-2</sup> ±2.40x10 <sup>-3</sup> | 3.54                                                  |
|                                                                                                  | I73M      | 6099.57±2524.58         | 1.72x10 <sup>-2</sup> ±2.93x10 <sup>-3</sup> | 2.81                                                  |
|                                                                                                  | V217C     | 6234.20±286.81          | 3.15x10 <sup>-2</sup> ±9.23x10 <sup>-4</sup> | 5.05                                                  |
|                                                                                                  | F318M     | 7621.10±3023.30         | 2.43x10 <sup>-2</sup> ±3.95x10 <sup>-3</sup> | 3.18                                                  |
|                                                                                                  | Wild-type | 1298.90±132.24          | 2.09x10 <sup>-2</sup> ±2.32x10 <sup>-3</sup> | 16.1                                                  |

|                                                                                                                         |           |                |                                               |                      |
|-------------------------------------------------------------------------------------------------------------------------|-----------|----------------|-----------------------------------------------|----------------------|
| Paraoxon ethyl<br>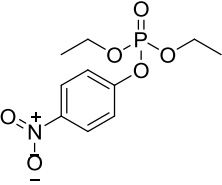                     | D327E     | 1756.13±138.53 | $4.73 \times 10^{-2} \pm 5.52 \times 10^{-3}$ | 26.9                 |
|                                                                                                                         | S319G     | 1591.67±73.84  | $6.04 \times 10^{-2} \pm 3.48 \times 10^{-3}$ | 38.0                 |
|                                                                                                                         | F318V     | 1965.10±605.32 | $2.03 \times 10^{-2} \pm 5.16 \times 10^{-3}$ | 10.3                 |
|                                                                                                                         | I73M      | 1930.97±833.69 | $1.86 \times 10^{-2} \pm 5.14 \times 10^{-3}$ | 9.61                 |
|                                                                                                                         | V217C     | 539.47±88.89   | $1.04 \times 10^{-2} \pm 5.43 \times 10^{-4}$ | 19.3                 |
|                                                                                                                         | F318M     | 580.65±433.36  | $3.72 \times 10^{-3} \pm 2.38 \times 10^{-3}$ | 6.40                 |
| <p><i>p</i>-Nitrophenyl butyrate</p>   | Wild-type | 407.20±18.21   | $1.37 \pm 5.47 \times 10^{-2}$                | 336 x10 <sup>1</sup> |
|                                                                                                                         | D327E     | 400.31±49.65   | $1.67 \pm 1.02 \times 10^{-1}$                | 418 x10 <sup>1</sup> |
|                                                                                                                         | S319G     | 464.57±28.55   | $8.97 \pm 2.42 \times 10^{-1}$                | 193 x10 <sup>2</sup> |
|                                                                                                                         | F318V     | 484.63±15.77   | $2.28 \times 10^{-1} \pm 5.37 \times 10^{-3}$ | 470                  |
|                                                                                                                         | I73M      | 474.67±28.09   | $6.49 \times 10^{-1} \pm 1.76 \times 10^{-2}$ | 137 x10 <sup>1</sup> |
|                                                                                                                         | V217C     | 345.06±48.44   | $8.28 \times 10^{-1} \pm 5.60 \times 10^{-2}$ | 240 x10 <sup>1</sup> |
|                                                                                                                         | F318M     | 433.24±11.97   | $1.15 \pm 2.98 \times 10^{-2}$                | 266 x10 <sup>1</sup> |
|                                                                                                                         |           |                |                                               |                      |
| L-Alanine <i>p</i> -nitroanilide<br> | Wild-type | 1586.40±605.27 | $1.65 \times 10^{-3} \pm 3.21 \times 10^{-4}$ | 1.04                 |
|                                                                                                                         | D327E     | 1583.23±331.47 | $1.83 \times 10^{-3} \pm 2.22 \times 10^{-4}$ | 1.15                 |
|                                                                                                                         | S319G     | 1548.77±258.10 | $2.58 \times 10^{-3} \pm 2.33 \times 10^{-4}$ | 1.67                 |
|                                                                                                                         | F318V     | 0              | 0                                             | 0                    |
|                                                                                                                         | I73M      | 816.55±46.60   | $1.78 \times 10^{-3} \pm 3.44 \times 10^{-5}$ | 2.19                 |
|                                                                                                                         | V217C     | 696.18±18.09   | $1.72 \times 10^{-3} \pm 5.69 \times 10^{-5}$ | 2.47                 |
|                                                                                                                         | F318M     | 0              | 0                                             | 0                    |
|                                                                                                                         |           |                |                                               |                      |
|                                                                                                                         | Wild-type |                |                                               | 0.43                 |



|                                                                                                                             |       |                                                |      |
|-----------------------------------------------------------------------------------------------------------------------------|-------|------------------------------------------------|------|
| <p style="text-align: center;">Diuron</p> 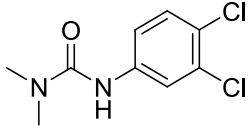 | D327E | Could not be determined due to low solubility. | 1.67 |
|                                                                                                                             | S319G |                                                | 2.43 |
|                                                                                                                             | F318V |                                                | 1.20 |
|                                                                                                                             | I73M  |                                                | 0.28 |
|                                                                                                                             | V217C |                                                | 0    |
|                                                                                                                             | F318M |                                                | 0.09 |

35
